# Supplementary material
Source: publisher figshare collection journal article supplement (https://frontiersin.figshare.com/ndownloader/files/24849677)
Supplement: Supplementary file 1 [file 24849677]

Supplementary Material

Table S1. Questioner with fishermen in Balikpapan Bay (translation from bahasa Indonesia)

| Name: Age: | | | | | |
| --- | --- | --- | --- | --- | --- |
| Place of residence: Since: | | | | | |
| Job: | | | | | |
| **Fisheries** | | | | | |
| 1. For how long have you been a fisherman? | | | | | |
| 1. Does fishing present the main income source or side income? (If side job continue at 3 and if the main income source continue at 4) | | | | | |
| 1. Does fishing represent a side job since for a long time or just since recently? Since when? | | | | | |
| 1. Which fish do you mostly catch per season? Only mention up to 5 most caught fish species per season. Fill out table on a separate form. | | | | | |
| - Season | - Fish species | - Fisheries tool | - Average Kg/ day | - Price/ kilo | - Fishing days/ - month |
|  | - 1-5:.................. |  |  |  |  |
|  | - etc |  |  |  |  |
| 1. Do you know any fish species that were caught before but now no longer? Since when? What is the reason according to you? | | | | | |
| 1. Where do you usually fish (draw on the map and give a mark i)? | | | | | |
| 1. a) Since when did fish catches started to decrease if there was any decrease? | | | | | |
| b) What do you think caused the decrease? | | | | | |
| 1. What has been an obstacle for you as a fisherman all this time? | | | | | |
| 1. How do you assess the government role in tackling these obstacles? (minor, average, good). Please explain. | | | | | |
| 1. What do you consider to be a major threat to fisheries inside and outside of the bay? | | | | | |
| 1. Do you think mangrove conservation is important for cultivation and why ? | | | | | |
| 1. What recommendation can you give to the government? | | | | | |
| 1. Are there any areas for fish protection and can you indicate them on the map? | | | | | |
| - **Pesut** | | | | | |
| 1. Have you ever seen a pesut or other dolphin species? Can you distinguish them? | | | | | |
| 1. Where have you seen them (indicate on the map)? | | | | | |
| 1. During what water condition (lunar cycle, month, tide) do you normally see them? | | | | | |
| 1. Has there been any change in numbers/ location or behaviors of pesut in time and if so since when? | | | | | |
| 1. What is the significance of pesut for you personally? | | | | | |
| 1. Do you have any interesting event or story to tell about pesut? | | | | | |
| 1. Have you ever seen a dead pesut or other dolphin species? Please describe species, year, month, size, gender, cause of death. | | | | | |
| - **Dugong** | | | | | |
| 1. Have you ever seen a Dugong, how do you identify it? | | | | | |
| 1. Where have you seen a dugong (indicate on map) | | | | | |
| 1. Can you indicate seagrass locations on the map? | | | | | |
| 1. During what water condition do you normally observe them? | | | | | |
| 1. Has there been any change in numbers/ location or behaviors of dugongs in time and if so since when? | | | | | |
| 1. What does the dugong mean to you personally? | | | | | |
| 1. Do you have any interesting event or story to tell about dugongs? | | | | | |
| 1. Have you ever seen a dead dugong? Please describe species, year, month, size, gender, cause of death. | | | | | |
